# Supplementary material for: Synthesis and characterization of novel poly cysteine methacrylate nanoparticles and their morphology and size studies
Source: Royal Society of Chemistry journal article supplement (doi:10.1039/d4ra00067f), 2024-01-01
Supplement: d4ra00067f1.pdf [file d4ra00067f1.pdf]

## Supplementary Information For

### Synthesis and Characterization of a Novel Poly Cysteine Methacrylate Nanoparticles and its Morphology and Size Studies

Yaseen G. Kareem,<sup>\*a</sup> O Al Jaf<sup>b</sup>, and Shwan Rachid<sup>c</sup>

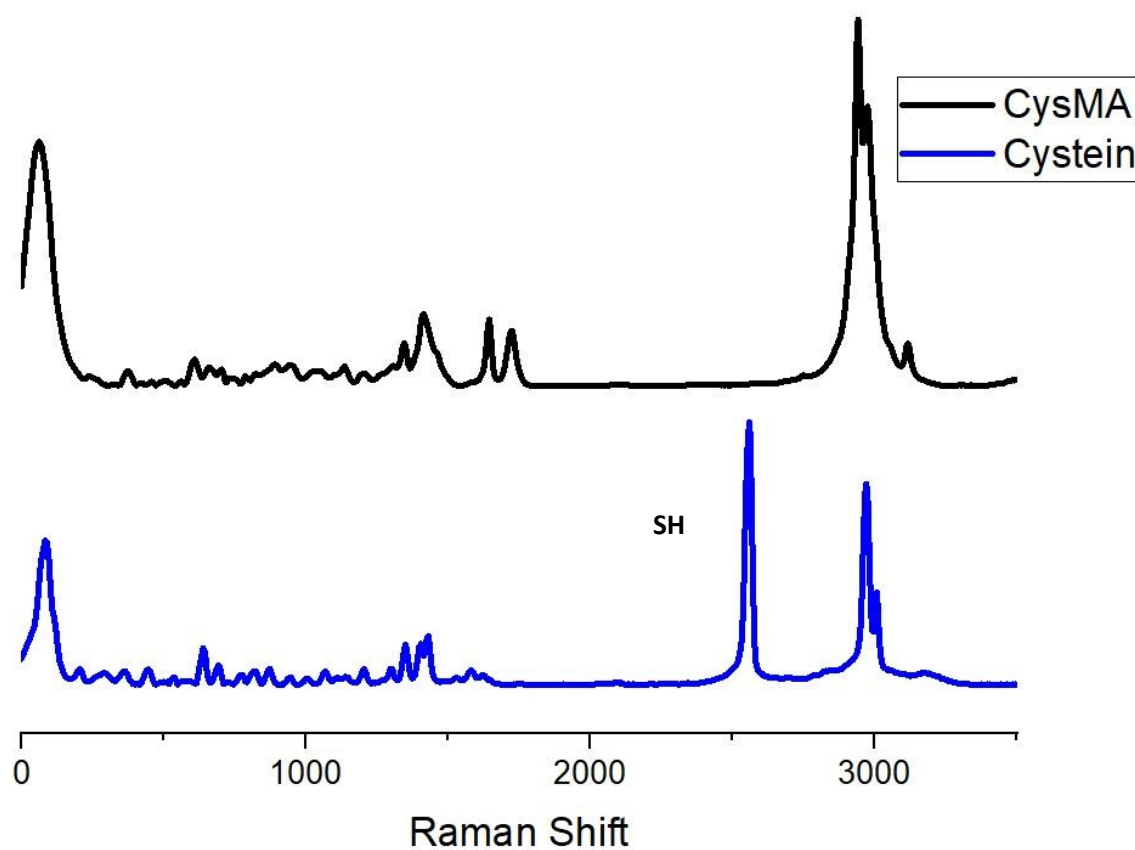

Figure S 2: RAMAN spectroscopy for (CysMA)

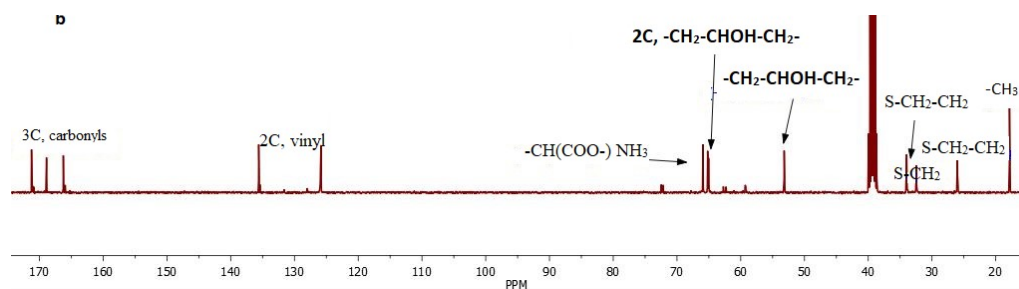

Figure S 1: a) <sup>1</sup>H NMR for CysMA monomer b) <sup>13</sup>C NMR for CysMA monomer

Figure S 3: RAMAN spectroscopy for (CysMA)

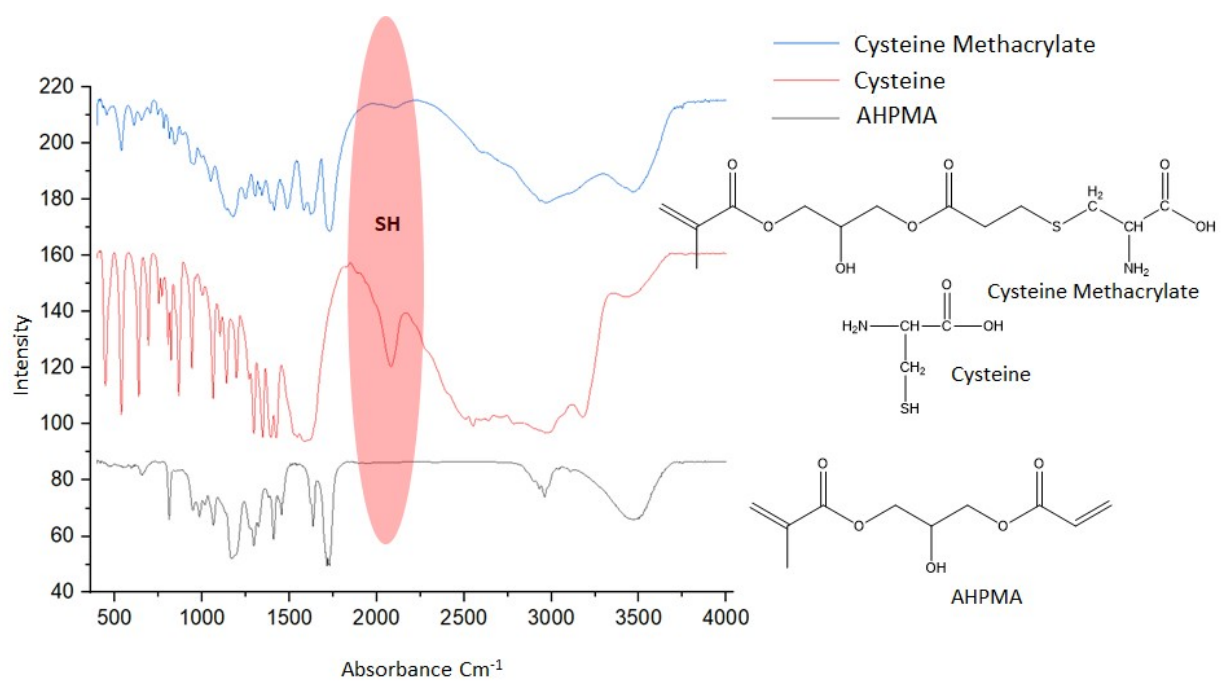

Figure S 3: FTIR spectroscopy for (AHPMA, Cysteine, and cysMA)
